# Supplementary material
Source: PubMed Central journal article supplement (PMC6107375)
Supplement: NIHMS972643-supplement-1.pdf [file NIHMS972643-supplement-1.pdf]

| Simulation  | Method                             | AMI           | NMI           | ARI           | Precision     | Recall        | $F_1$         |
|-------------|------------------------------------|---------------|---------------|---------------|---------------|---------------|---------------|
| Dataset I-1 | Gaussian-HMM                       | 0.7863        | 0.8216        | 0.5941        | 0.8206        | 0.5569        | 0.6629        |
| Dataset I-1 | GMM                                | 0.7562        | 0.7985        | 0.6340        | <b>0.8903</b> | 0.5679        | 0.6932        |
| Dataset I-1 | Clustering                         | 0.6471        | 0.6926        | 0.4752        | 0.7539        | 0.4412        | 0.5558        |
| Dataset I-1 | Phylo-HMM-BM                       | 0.8190        | 0.8494        | 0.7801        | 0.8496        | 0.8122        | 0.8226        |
| Dataset I-1 | Phylo-HMM-OU ( $\lambda_0 = 0$ )   | 0.7966        | 0.8183        | 0.6088        | 0.7973        | 0.5918        | 0.6786        |
| Dataset I-1 | Phylo-HMM-OU ( $\lambda_0 = 4.0$ ) | <b>0.8309</b> | <b>0.8733</b> | <b>0.8405</b> | 0.8568        | <b>0.8986</b> | <b>0.8728</b> |
| Dataset I-2 | Gaussian-HMM                       | 0.5342        | 0.6901        | 0.2931        | 0.9666        | 0.2948        | 0.4519        |
| Dataset I-2 | GMM                                | 0.3446        | 0.4508        | 0.1884        | 0.8114        | 0.2335        | 0.3625        |
| Dataset I-2 | Clustering                         | 0.2692        | 0.3599        | 0.1157        | 0.7173        | 0.1768        | 0.2837        |
| Dataset I-2 | Phylo-HMM-BM                       | 0.5208        | 0.6621        | 0.3150        | 0.9531        | 0.3218        | 0.4810        |
| Dataset I-2 | Phylo-HMM-OU ( $\lambda_0 = 0$ )   | 0.5315        | 0.6782        | 0.3149        | 0.9602        | 0.3191        | 0.4790        |
| Dataset I-2 | Phylo-HMM-OU ( $\lambda_0 = 4.0$ ) | <b>0.7691</b> | <b>0.8229</b> | <b>0.7638</b> | <b>0.9811</b> | <b>0.7718</b> | <b>0.8565</b> |
| Dataset I-3 | Gaussian-HMM                       | 0.7323        | 0.7912        | 0.4919        | 0.8314        | 0.4476        | 0.5819        |
| Dataset I-3 | GMM                                | 0.5536        | 0.6200        | 0.3354        | 0.7442        | 0.3057        | 0.4334        |
| Dataset I-3 | Clustering                         | 0.4973        | 0.5561        | 0.2798        | 0.6580        | 0.2741        | 0.3870        |
| Dataset I-3 | Phylo-HMM-BM                       | 0.6752        | 0.7277        | 0.4282        | 0.7646        | 0.4045        | 0.5283        |
| Dataset I-3 | Phylo-HMM-OU ( $\lambda_0 = 0$ )   | 0.7146        | 0.7698        | 0.4741        | 0.8088        | 0.4372        | 0.5674        |
| Dataset I-3 | Phylo-HMM-OU ( $\lambda_0 = 4.0$ ) | <b>0.8309</b> | <b>0.8733</b> | <b>0.8405</b> | <b>0.8568</b> | <b>0.8986</b> | <b>0.8728</b> |
| Dataset I-4 | Gaussian-HMM                       | 0.6965        | 0.7967        | 0.4824        | 0.9585        | 0.4482        | 0.6095        |
| Dataset I-4 | GMM                                | 0.7185        | 0.8106        | 0.5241        | 0.9737        | 0.4849        | 0.6457        |
| Dataset I-4 | Clustering                         | 0.5812        | 0.6810        | 0.3535        | 0.8928        | 0.3395        | 0.4911        |
| Dataset I-4 | Phylo-HMM-BM                       | 0.8151        | 0.8644        | 0.7342        | <b>0.9756</b> | 0.7112        | 0.8174        |
| Dataset I-4 | Phylo-HMM-OU ( $\lambda_0 = 0$ )   | 0.7946        | 0.8544        | 0.6846        | 0.9736        | 0.6589        | 0.7776        |
| Dataset I-4 | Phylo-HMM-OU ( $\lambda_0 = 4.0$ ) | <b>0.8396</b> | <b>0.8607</b> | <b>0.8146</b> | 0.9687        | <b>0.8071</b> | <b>0.8792</b> |
| Dataset I-5 | Gaussian-HMM                       | 0.7688        | 0.8331        | 0.5644        | 0.9091        | 0.4908        | 0.6374        |
| Dataset I-5 | GMM                                | 0.6398        | 0.6949        | 0.5065        | 0.8366        | 0.4552        | 0.5893        |
| Dataset I-5 | Clustering                         | 0.5298        | 0.5906        | 0.3494        | 0.7227        | 0.3218        | 0.4453        |
| Dataset I-5 | Phylo-HMM-BM                       | 0.7654        | 0.8243        | 0.5594        | 0.8908        | 0.4929        | 0.6346        |
| Dataset I-5 | Phylo-HMM-OU ( $\lambda_0 = 0$ )   | 0.7738        | 0.8370        | 0.5809        | 0.9180        | 0.5057        | 0.6521        |
| Dataset I-5 | Phylo-HMM-OU ( $\lambda_0 = 4.0$ ) | <b>0.8798</b> | <b>0.9187</b> | <b>0.9594</b> | <b>0.9524</b> | <b>0.9867</b> | <b>0.9692</b> |
| Dataset I-6 | Gaussian-HMM                       | 0.8736        | <b>0.9141</b> | 0.7466        | <b>0.9642</b> | 0.6635        | 0.7861        |
| Dataset I-6 | GMM                                | 0.7810        | 0.8157        | 0.6810        | 0.8884        | 0.6215        | 0.7312        |
| Dataset I-6 | Clustering                         | 0.6409        | 0.6785        | 0.5101        | 0.7457        | 0.4791        | 0.5833        |
| Dataset I-6 | Phylo-HMM-BM                       | 0.8554        | 0.8772        | 0.7534        | 0.9052        | 0.7133        | 0.7932        |
| Dataset I-6 | Phylo-HMM-OU ( $\lambda_0 = 0$ )   | 0.8538        | 0.8891        | 0.7216        | 0.9325        | 0.6490        | 0.7652        |
| Dataset I-6 | Phylo-HMM-OU ( $\lambda_0 = 4.0$ ) | <b>0.8906</b> | 0.8958        | <b>0.8390</b> | 0.9224        | <b>0.8200</b> | <b>0.8678</b> |

**Table S1:** Performance evaluation of Gaussian-HMM, GMM (Gaussian Mixture Model), K-means Clustering, Phylo-HMGP-BM, Phylo-HMGP-OU ( $\lambda_0 = 0$ ), and Phylo-HMGP-OU ( $\lambda_0 = 4.0$ ) on six simulated datasets in Simulation Study I with respect to AMI (Adjusted Mutual Information), NMI (Normalized Mutual Information), ARI (Adjusted Rand Index), Precision, Recall, and  $F_1$  score. Related to Figure 2. Each method is repeated 10 times with different initializations on each simulation dataset. The average performance from the 10 repeated runs of each method is presented. The best performance of the compared methods is in bold font.

| Simulation   | Method       | AMI           | NMI           | ARI           | Precision     | Recall        | $F_1$         |
|--------------|--------------|---------------|---------------|---------------|---------------|---------------|---------------|
| Dataset II-1 | Gaussian-HMM | 0.8314        | 0.8765        | 0.6693        | <b>0.9244</b> | 0.5965        | 0.7251        |
| Dataset II-1 | GMM          | 0.7399        | 0.7823        | 0.6138        | 0.8800        | 0.5511        | 0.6776        |
| Dataset II-1 | Clustering   | 0.6144        | 0.6623        | 0.4509        | 0.7579        | 0.4124        | 0.5341        |
| Dataset II-1 | Phylo-HMM-BM | 0.8511        | <b>0.8796</b> | <b>0.7786</b> | 0.8785        | <b>0.7842</b> | <b>0.8205</b> |
| Dataset II-1 | Phylo-HMM-OU | <b>0.8534</b> | 0.8706        | 0.7385        | 0.8319        | 0.7591        | 0.7906        |
| Dataset II-2 | Gaussian-HMM | 0.5328        | 0.6863        | 0.2957        | 0.9550        | 0.3099        | 0.4680        |
| Dataset II-2 | GMM          | 0.3421        | 0.4477        | 0.1893        | 0.8206        | 0.2416        | 0.3733        |
| Dataset II-2 | Clustering   | 0.2590        | 0.3481        | 0.1119        | 0.7278        | 0.1780        | 0.2860        |
| Dataset II-2 | Phylo-HMM-BM | 0.5343        | 0.6877        | 0.2944        | 0.9550        | 0.3085        | 0.4663        |
| Dataset II-2 | Phylo-HMM-OU | <b>0.6901</b> | <b>0.7833</b> | <b>0.5883</b> | <b>0.9736</b> | <b>0.6033</b> | <b>0.7353</b> |
| Dataset II-3 | Gaussian-HMM | 0.7754        | 0.8307        | 0.5236        | <b>0.8469</b> | 0.4700        | 0.6045        |
| Dataset II-3 | GMM          | 0.5641        | 0.6248        | 0.3463        | 0.7225        | 0.3176        | 0.4412        |
| Dataset II-3 | Clustering   | 0.5098        | 0.5606        | 0.2991        | 0.6385        | 0.2963        | 0.4048        |
| Dataset II-3 | Phylo-HMM-BM | 0.7239        | 0.7727        | 0.4652        | 0.7793        | 0.4338        | 0.5561        |
| Dataset II-3 | Phylo-HMM-OU | <b>0.8159</b> | <b>0.8952</b> | <b>0.8797</b> | <b>0.8469</b> | <b>0.9848</b> | <b>0.9105</b> |
| Dataset II-4 | Gaussian-HMM | 0.6585        | 0.7623        | 0.4139        | 0.9318        | 0.3898        | 0.5497        |
| Dataset II-4 | GMM          | 0.7451        | 0.8262        | 0.5859        | <b>0.9778</b> | 0.5486        | 0.7027        |
| Dataset II-4 | Clustering   | 0.5411        | 0.6463        | 0.2933        | 0.8678        | 0.2868        | 0.4307        |
| Dataset II-4 | Phylo-HMM-BM | 0.7857        | 0.8411        | 0.6904        | 0.9543        | 0.6812        | 0.7775        |
| Dataset II-4 | Phylo-HMM-OU | <b>0.8092</b> | <b>0.8556</b> | <b>0.7135</b> | 0.9583        | <b>0.7045</b> | <b>0.7981</b> |
| Dataset II-5 | Gaussian-HMM | 0.7932        | 0.8529        | 0.5842        | 0.9078        | 0.5125        | 0.6551        |
| Dataset II-5 | GMM          | 0.6640        | 0.7155        | 0.5399        | 0.8595        | 0.4827        | 0.6173        |
| Dataset II-5 | Clustering   | 0.5317        | 0.5894        | 0.3375        | 0.7028        | 0.3142        | 0.4343        |
| Dataset II-5 | Phylo-HMM-BM | 0.7999        | 0.8595        | 0.5891        | 0.9223        | 0.5139        | 0.6573        |
| Dataset II-5 | Phylo-HMM-OU | <b>0.9162</b> | <b>0.9454</b> | <b>0.9504</b> | <b>0.9555</b> | <b>0.9694</b> | <b>0.9622</b> |
| Dataset II-6 | Gaussian-HMM | 0.8600        | 0.8969        | 0.7162        | <b>0.9411</b> | 0.6396        | 0.7613        |
| Dataset II-6 | GMM          | 0.7742        | 0.8118        | 0.6665        | 0.8887        | 0.6050        | 0.7197        |
| Dataset II-6 | Clustering   | 0.6319        | 0.6733        | 0.5036        | 0.7554        | 0.4689        | 0.5784        |
| Dataset II-6 | Phylo-HMM-BM | 0.8371        | 0.8612        | 0.7241        | 0.8788        | 0.6944        | 0.7701        |
| Dataset II-6 | Phylo-HMM-OU | <b>0.9117</b> | <b>0.9150</b> | <b>0.8632</b> | 0.9314        | <b>0.8506</b> | <b>0.8888</b> |

**Table S2:** Performance evaluation of Gaussian-HMM, GMM, K-means Clustering, Phylo-HMGP-BM, and Phylo-HMGP-OU ( $\lambda_0 = 4.0$ ) on six simulated datasets in Simulation Study II with respect to AMI, NMI, ARI, Precision, Recall, and  $F_1$  score. Related to Figure 2. Each method is repeated 10 times with different initializations on each simulation dataset. The average performance from the 10 repeated runs of each method is presented. The best performance of the compared methods is in bold font.

| Conserved<br>RT early                        | GO term/Pathway                                      | Count | Fold<br>enrichment | <i>p</i> -value |
|----------------------------------------------|------------------------------------------------------|-------|--------------------|-----------------|
| Constitutive<br>RT early                     | intracellular transport                              | 431   | 1.2                | 6.4e-06         |
|                                              | amide biosynthetic process                           | 214   | 1.3                | 1.5e-05         |
|                                              | posttranscriptional regulation of gene expression    | 149   | 1.4                | 2.0e-05         |
|                                              | cellular amide metabolic process                     | 277   | 1.2                | 2.0e-05         |
|                                              | peptide biosynthetic process                         | 195   | 1.3                | 2.4e-05         |
|                                              | peptide metabolic process                            | 231   | 1.3                | 2.5e-05         |
|                                              | mRNA metabolic process                               | 193   | 1.2                | 5.8e-05         |
|                                              | translation                                          | 187   | 1.3                | 5.9e-05         |
|                                              | microtubule-based process                            | 179   | 1.3                | 1.0e-04         |
|                                              | clathrin-mediated endocytosis                        | 22    | 2.1                | 3.0e-04         |
| regulation of vascular permeability          | 18                                                   | 2.3   | 3.9e-04            |                 |
| mitochondrion organization                   | 183                                                  | 1.2   | 7.2e-04            |                 |
| Non-constitutive<br>RT early                 | immune response                                      | 540   | 1.3                | 7.9e-013        |
|                                              | regulation of immune response                        | 327   | 1.3                | 2.7e-010        |
|                                              | defense response                                     | 520   | 1.2                | 5.5e-08         |
|                                              | symbiosis, encompassing mutualism through parasitism | 376   | 1.2                | 5.7e-08         |
|                                              | interspecies interaction between organisms           | 376   | 1.2                | 5.7e-08         |
|                                              | viral process                                        | 362   | 1.2                | 1.2e-07         |
|                                              | multi-organism cellular process                      | 364   | 1.2                | 1.7e-07         |
|                                              | immune effector process                              | 257   | 1.3                | 2.6e-07         |
|                                              | immune response-activating signal transduction       | 176   | 1.4                | 7.9e-07         |
|                                              | activation of immune response                        | 192   | 1.3                | 1.1e-06         |
| immune response-regulating signaling pathway | 186                                                  | 1.3   | 1.2e-06            |                 |
| regulation of immune system process          | 465                                                  | 1.2   | 2.5e-06            |                 |

**Table S3:** Gene ontology (GO) terms or pathways that show significant correlation with regions that are both constitutive RT early and conserved RT early, and regions that are conserved RT early but not constitutive RT early. Related to Figure 3. We used DAVID to perform the gene ontology analysis. The column Count represents the number of genes found to be associated with the corresponding GO term/pathway in the queried regions. The conserved early RT regions are based on state prediction by Phylo-HMGP. We observed that genes enriched in the regions that are both constitutive early and conserved early are mainly involved in basic biological functions and processes that are shared between different cell types. Genes associated with the regions that are not constitutive early but conserved early are involved in the cell type specific functions of the lymphoblastoid cells, such as the immune response functions.

| Predicted state | GO term/Pathway                                                    | Count | Fold enrichment | <i>p</i> -value |
|-----------------|--------------------------------------------------------------------|-------|-----------------|-----------------|
| State 9         | sensory perception of smell                                        | 16    | 8.5             | 1.9e-09         |
|                 | detection of chemical stimulus                                     | 17    | 6.6             | 6.3e-09         |
|                 | detection of stimulus involved in sensory perception               | 17    | 6.4             | 9.2e-09         |
|                 | olfactory transduction                                             | 16    | 6.0             | 4.1e-08         |
|                 | sensory perception                                                 | 21    | 2.9             | 3.6e-05         |
|                 | neurological system process                                        | 23    | 2.2             | 8.2e-04         |
| State 10        | regulation of nucleic acid-templated transcription                 | 95    | 1.5             | 1.4e-05         |
|                 | regulation of RNA biosynthetic process                             | 95    | 1.5             | 1.9e-05         |
|                 | regulation of nucleobase-containing compound metabolic process     | 101   | 1.4             | 1.4e-04         |
|                 | aromatic compound biosynthetic process                             | 107   | 1.4             | 1.5e-04         |
|                 | heterocycle biosynthetic process                                   | 106   | 1.4             | 2.1e-04         |
|                 | regulation of nitrogen compound metabolic process                  | 104   | 1.3             | 5.8e-04         |
|                 | cellular macromolecule biosynthetic process                        | 114   | 1.3             | 1.1e-03         |
|                 | G-protein coupled purinergic nucleotide receptor signaling pathway | 4     | 33.2            | 2.0e-04         |
| State 11        | cellular response to organic substance                             | 32    | 1.8             | 1.6e-03         |
|                 | insulin secretion                                                  | 6     | 5.0             | 6.7e-03         |
|                 | response to endogenous stimulus                                    | 23    | 1.8             | 9.6e-03         |
|                 | endocardial cushion morphogenesis                                  | 7     | 15.6            | 4.4e-06         |
| State 14        | cartilage development                                              | 13    | 4.9             | 1.4e-05         |
|                 | endocardial cushion development                                    | 7     | 11.6            | 2.7e-05         |
|                 | connective tissue development                                      | 14    | 4.1             | 4.1e-05         |
|                 | pattern specification process                                      | 18    | 2.8             | 2.1e-04         |
|                 | organ morphogenesis                                                | 29    | 2.0             | 5.1e-04         |
|                 | enzyme linked receptor protein signaling pathway                   | 27    | 2.0             | 1.1e-03         |
|                 | circulatory system development                                     | 27    | 2.0             | 1.3e-03         |
|                 | cardiovascular system development                                  | 27    | 2.0             | 1.3e-03         |
| State 16        | cell adhesion                                                      | 27    | 2.2             | 1.4e-04         |
|                 | regulation of nervous system development                           | 15    | 2.6             | 1.5e-03         |
|                 | regulation of neurogenesis                                         | 13    | 2.6             | 4.3e-03         |
|                 | regulation of cellular component organization                      | 29    | 1.7             | 4.5e-03         |
|                 | neuron projection morphogenesis                                    | 11    | 2.8             | 6.1e-03         |
|                 | neuron differentiation                                             | 18    | 2.0             | 8.3e-03         |
| State 18        | regulation of locomotion                                           | 32    | 2.6             | 1.4e-06         |
|                 | regulation of cell motility                                        | 31    | 2.7             | 1.6e-06         |
|                 | regulation of cell migration                                       | 29    | 2.7             | 3.5e-06         |
|                 | regulation of cell differentiation                                 | 45    | 1.9             | 4.0e-05         |
|                 | epithelium development                                             | 33    | 1.9             | 3.4e-04         |
|                 | cell proliferation                                                 | 43    | 1.5             | 6.6e-03         |
|                 | regulation of anatomical structure morphogenesis                   | 28    | 1.7             | 7.8e-03         |
|                 | movement of cell or subcellular component                          | 42    | 1.5             | 8.3e-03         |

**Table S4:** Example gene ontology (GO) terms or pathways that show significant correlation with lineage-specific RT states (State 9: human-chimpanzee specific early RT state; State 10: human-chimpanzee specific late RT state; State 11: human-chimpanzee-orangutan specific early RT state; State 14: orangutan specific late RT state; State 16: gibbon specific late RT state; State 18: green monkey specific late RT state). Related to Figure 4. We use DAVID to perform the gene ontology analysis.

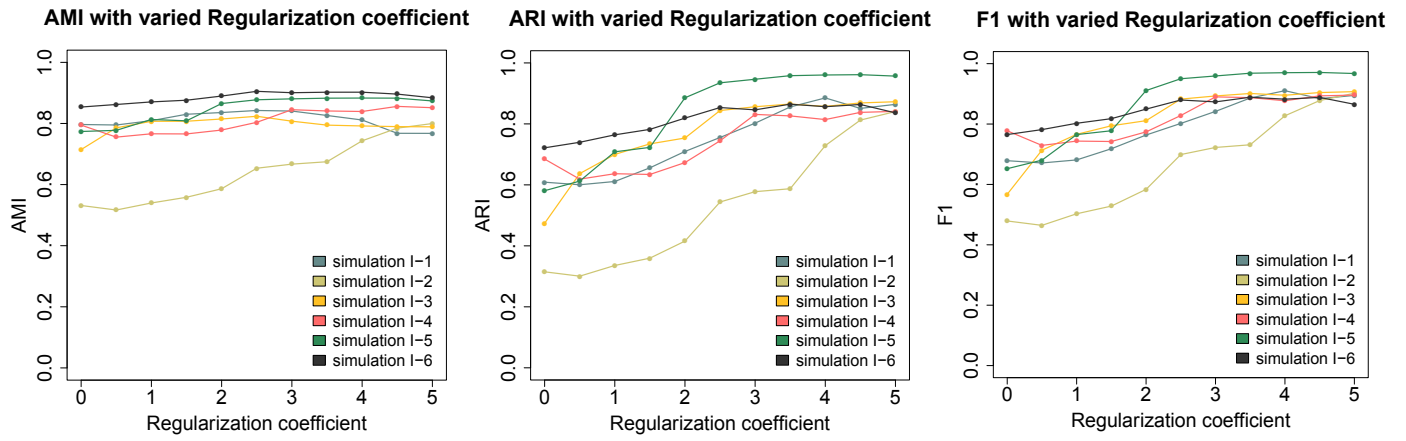

**Figure S1:** Performance evaluation on AMI, ARI, and  $F_1$  score in Simulation Study I with respect to varied  $l_2$ -norm regularization coefficient  $\lambda_0$ . Related to Figure 2.

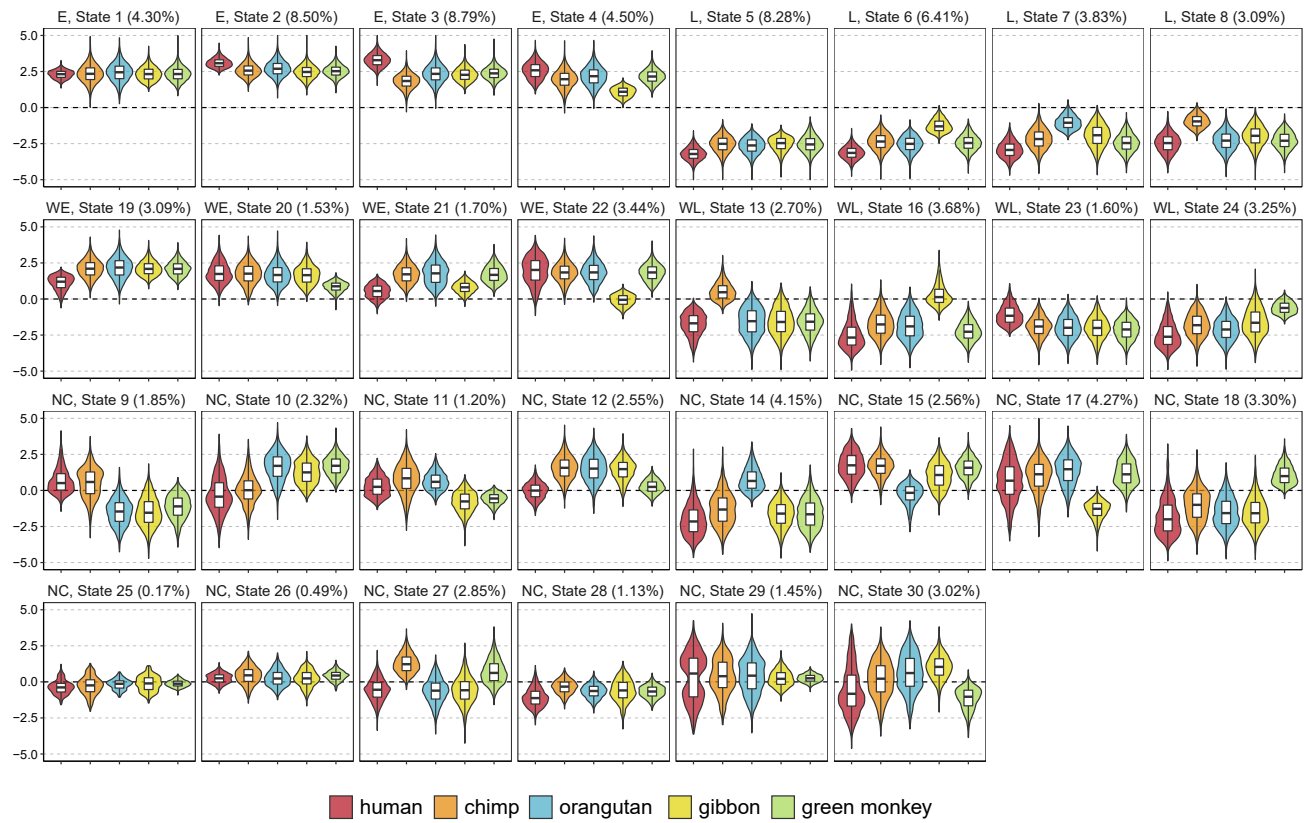

**Figure S2:** Different patterns of replication timing (RT) across five primate species predicted by Phylo-HMGP-OU for 30 states. Related to Figure 3. The y-axis represents the RT signal value. Box plots of the RT signal distributions of the five primate species in each predicted state are shown. The percentage of the number of regions in each predicted state and the RT group label are also shown in the title of each plot.

### State number estimation from K-means clustering

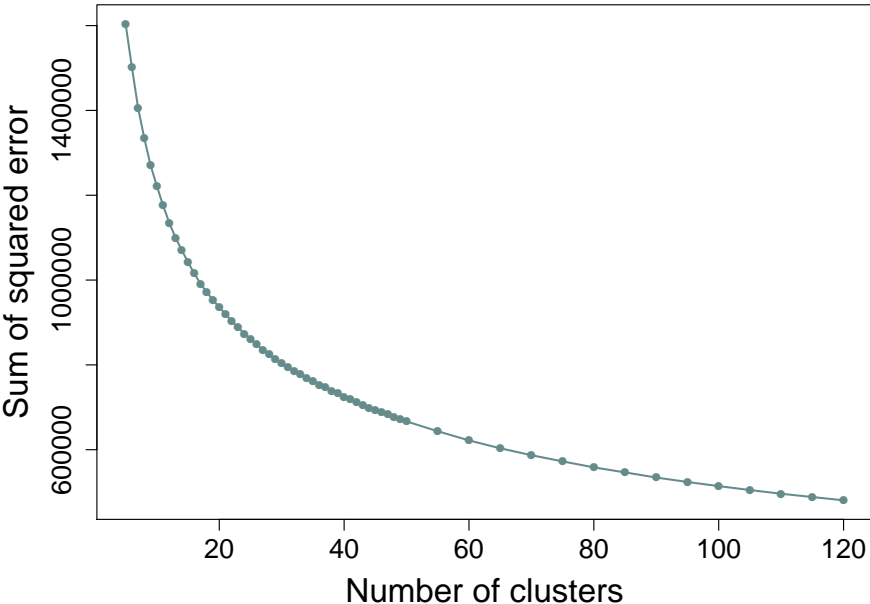

**Figure S3:** The change of Sum of Squared Error (SSE) with respect to an increased cluster number in K-means clustering on RT data. Related to Figure 3. The state number was estimated to be between 20 and 40 based on the results from K-means clustering.

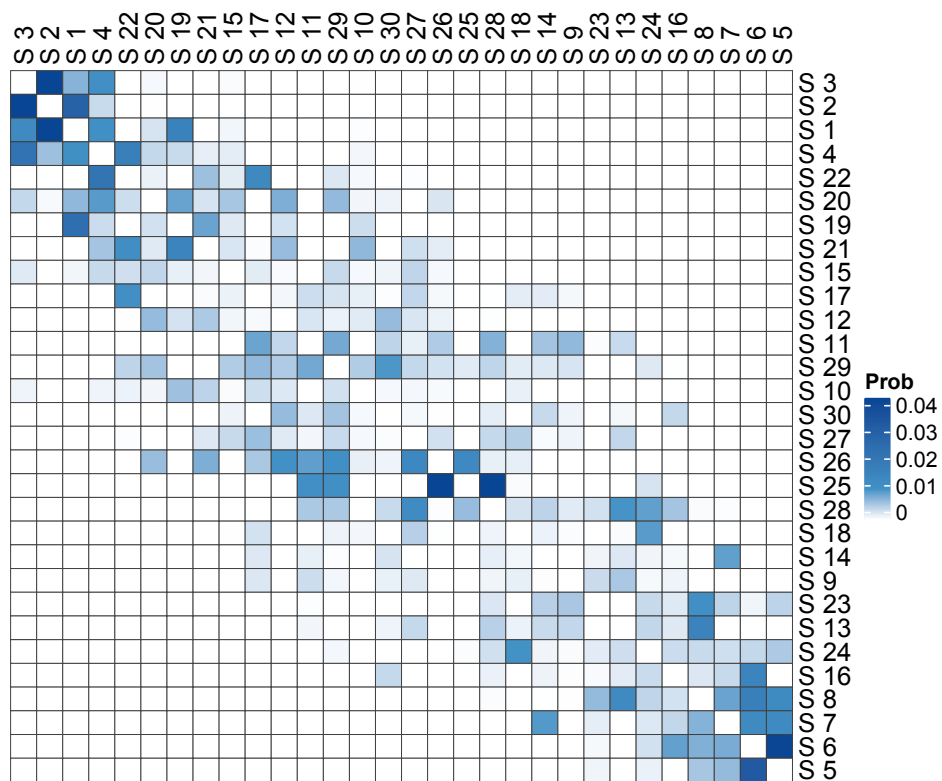

**Figure S4:** Transition probability matrix of the 30 states estimated by Phylo-HMGP-OU. Related to Figure 3. The self-transition probability is not shown (set to be blank) to illustrate the probabilities of transitions to other states more significantly.



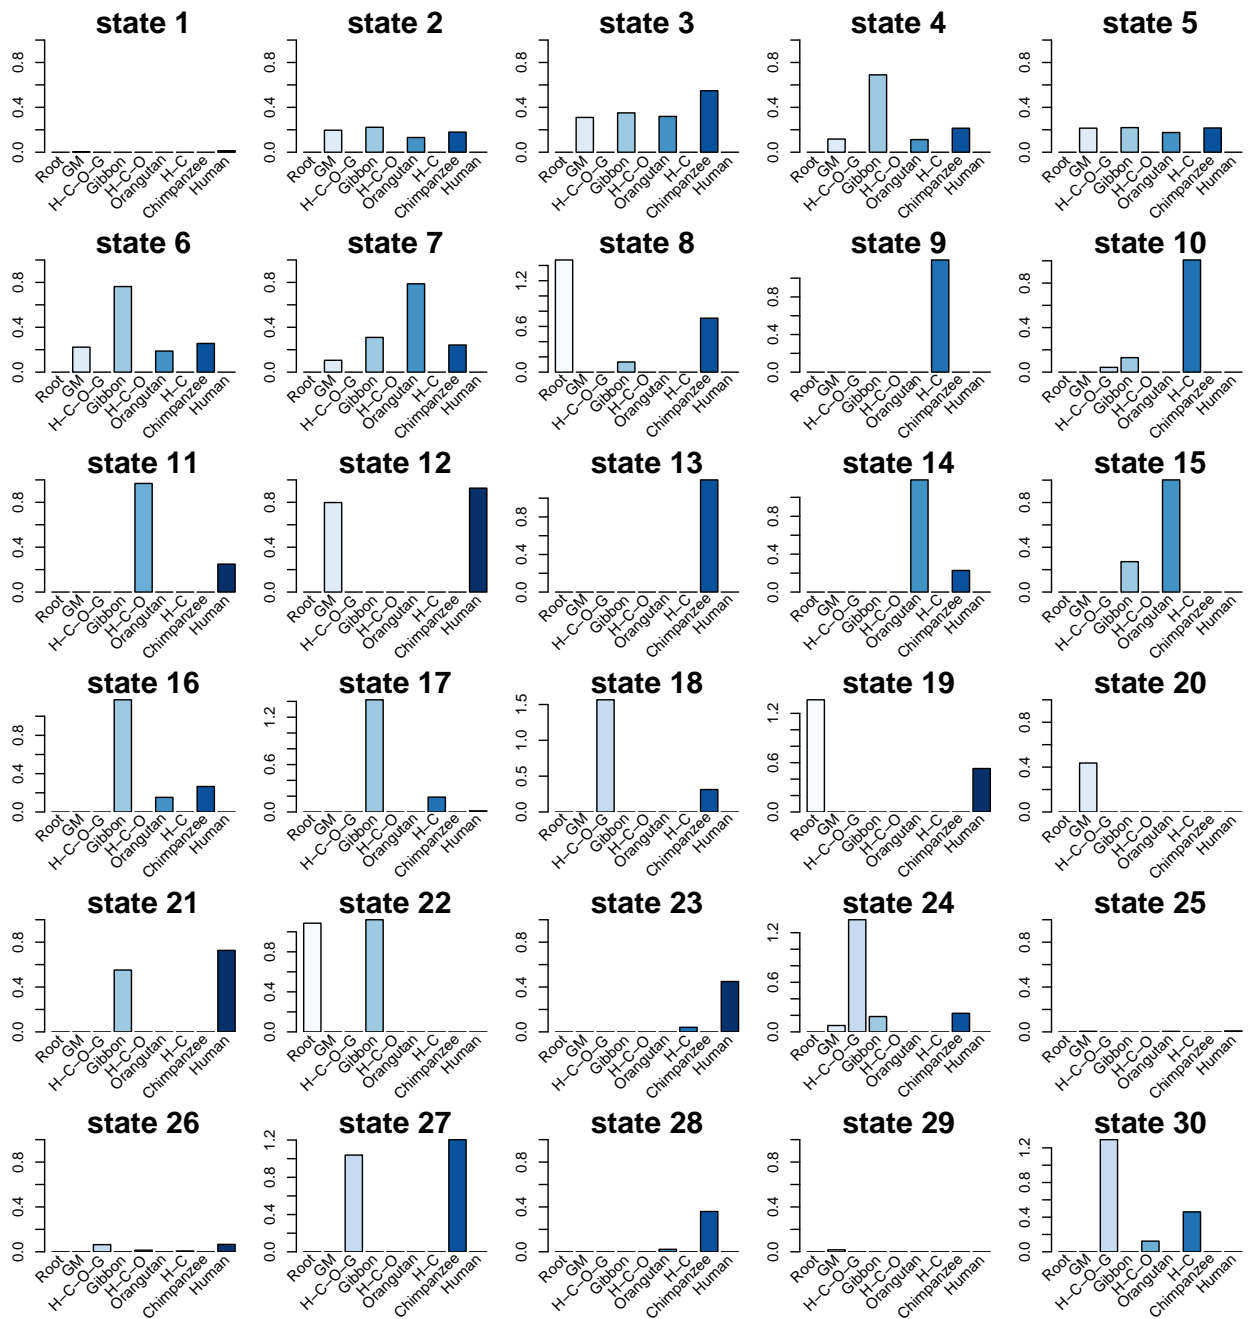

**Figure S5:** Estimated selection strength along each branch of the phylogenetic tree in the 30 states predicted by Phylo-HMGP-OU. Related to Figure 3. ‘GM’ stands for Green Monkey. Each column corresponds to the branch connecting the nearest ancestor of the species specified by the species name to the species. Root stands for the branch connecting the remote root node ancestor with the nearest common ancestor of green monkey and human. H-C-O-G, H-C-O, and H-C represent the branches leading to the clade of human, chimpanzee, orangutan, and gibbon, the clade of human, chimpanzee, and orangutan, and the clade of human and chimpanzee, respectively.

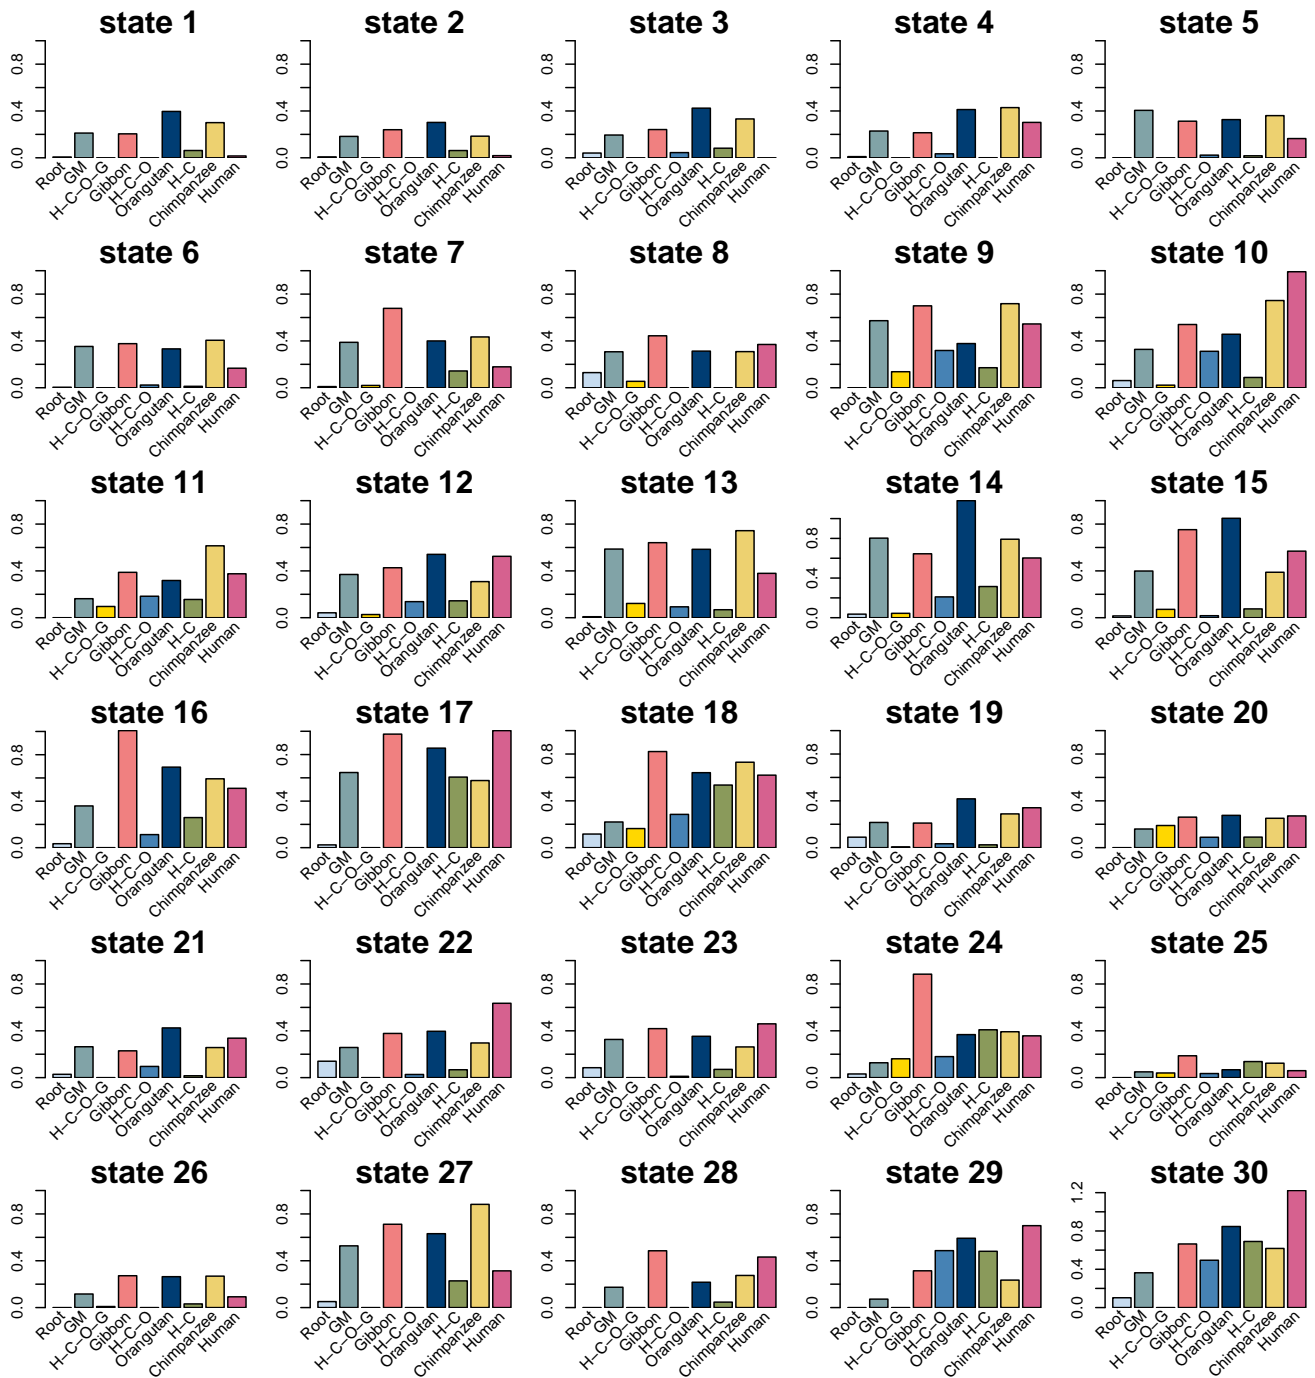

**Figure S6:** Estimated Brownian motion intensity along each branch of the phylogenetic tree in the 30 states predicted by Phylo-HMGP-OU. Related to Figure 3. 'GM' stands for Green Monkey. Each column corresponds to the branch connecting the nearest ancestor of the species specified by the species name to the species. Root stands for the branch connecting the remote root node ancestor with the nearest common ancestor of green monkey and human. H-C-O-G, H-C-O, and H-C represent the branches leading to the clade of human, chimpanzee, orangutan, and gibbon, the clade of human, chimpanzee, and orangutan, and the clade of human and chimpanzee, respectively.

## Evaluation on selected RT regions

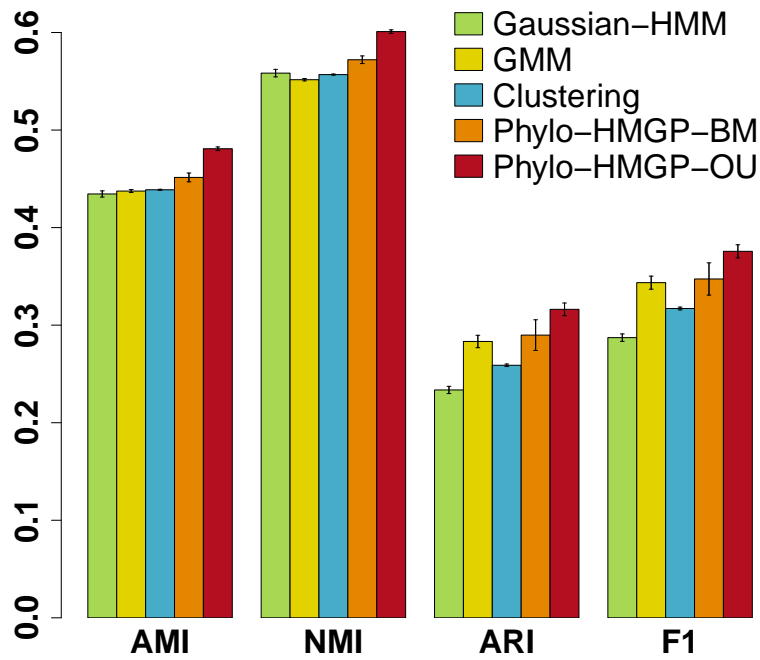

**Figure S7:** Evaluation of Gaussian-HMM, GMM, K-means Clustering, Phylo-HMGP-BM, and Phylo-HMGP-OU on the replication timing dataset in terms of AMI, NMI, ARI and  $F_1$  score in the genomic regions of 12 different states (including 10 lineage-specific states and two conserved states) identified from comparison of discretized single-species observations. Related to Figure 3. The standard error of the results of 10 repeated runs for each method is shown as the error bar.

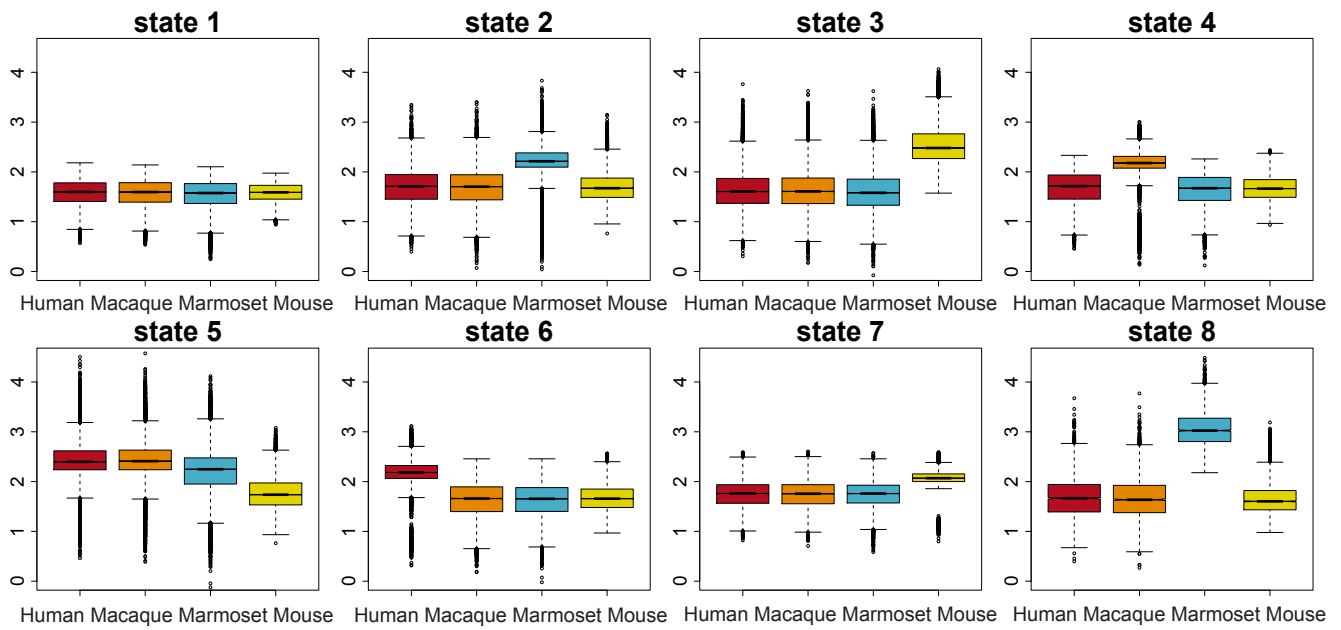

**Figure S8:** Different patterns of CRM (*cis*-regulatory module) score across four mammalian species (human, macaque, marmoset, and mouse) predicted by Phylo-HMGP-OU. Related to Figure 1. Box plots of the top 8 states with the most number of genomic regions are shown. The y-axis represents the logarithm of the CRM score.

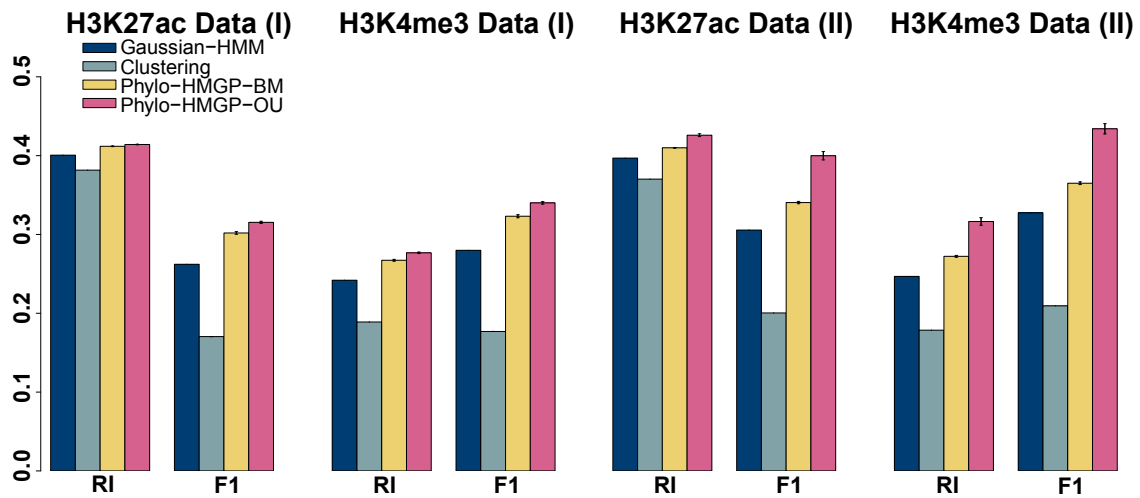

**Figure S9:** Evaluation of Gaussian-HMM, K-means Clustering, Phylo-HMGP-BM, and Phylo-HMGP-OU on H3K27ac and H3K4me3 ChIP-seq datasets in terms of RI (Rand Index), and  $F_1$  score. Related to Figure 1. Experiments (I) represent they are performed for the four mammal species. Experiments (II) represent they are performed for the three primate species human, macaque, and marmoset. The standard error of the results of 10 repeated runs for each method is shown as the error bar.
